# Supplementary material for: Glucosidase II and N-glycan mannose content regulate the half-lives of monoglucosylated species in vivo
Source: PubMed Central journal article supplement — Mol Biol Cell. 2011 Jun 1;22(11):1810–23. doi: 10.1091/mbc.E11-01-0019 (PMC3103398; doi:10.1091/mbc.e11-01-0019), 2011-06-01

*H. sapiens* - - - - - M L L P L L L L L P M C W A V E V K R P R G V S L T N H H - - F Y D E S K - - - - - P F T C L D - G S A T I P F D Q V N D D Y C D C K D G S D E P G T A A C P N 72  
*S. pombe* - - M K F S Q W Y T L T A P L L I S S L Y T V N A A N D L R G V A S D K S D L Y K P D A - K G N W K C L G - S D K L I S F N Q V N D D Y C D C P D G S D E P G T S A C H N 81  
*L. mexicana* - - - M A T I R W T L F A V I L F C S V L T P V H G R I L G V Q S R H T A Y F D A A K N - T G A F R C L D - G S A T I P F S A V N D I C D C T D G S D E P G T S A C T A 80  
*S. cerevisiae* M V S M F S L F L L L I E Q S P L V A S L Q Q S Q R H I V G V P W E K Q H L Y D S N E P D L T K W H C L N H E D I V L D I S Q I N D G V C D C P D G S D E P G S A C V E 85

*H. sapiens* G S - - - - - F H C T N T G Y K P L Y I P S N R V N D G V C D C C D G T D E Y N S G V I C E N T C K - - - - - E K G R K E 123  
*S. pombe* G K - - - - - F F C K N T G Y I S S Y I P S N R V D D T V C D C C D G S D E S - - L I K C P N T C A - - - - - Q K A R E Y 130  
*L. mexicana* L R G S A L T L F P Q D W - - K F Q C T S E E P V S Q A F P H N H V N D G I C D C C D G S D E V G S P T L C P N R C A - - - - - E M A R E L 143  
*S. cerevisiae* D I F K S V A E G G G K V N K Y F Y C D N K G F I P R Y I R K S E V A D G I C D C C D C S D E L L S G Y E L F D A G S N C S Q L K N E F D I M A S K E L S S Y R E G K E A 170

*H. sapiens* R E S L Q Q M A E V T R E G F R L K K I L I E D W K K A R E E K Q K K L I E L Q A G - - - - - K K S L E D Q V E M L R T V K E E A E K P - - - - - E 187  
*S. pombe* L A T L E E H N R L V K N G L K I R E Q W A L E S A K K T D E V K A R Y K E I S D S - - - - - L V A V S A E K T Q L S E K V E K M K R S T D L G A E 199  
*L. mexicana* V R E R K A E Q E R S R K A A E S K A V M H S A A V R R R E E A A K S L I E L E T E - - - - - Y A Q I V A D L P I L E A R K A A A E K - - - - - 205  
*S. cerevisiae* L E E L E R K Y G T K E E A I T R G N C L E E D K E K A S A E I K V L S N R L S E N R A K L E Q L R G E Y F N Q L S H D P I L Y Q F E Q L N S T R L G S D I L T S F T M V 255

*H. sapiens* R E A K E Q H Q K L W E E Q L A A A K A Q Q - - - - - E Q E L A A D A F K E L D D D M D G T V S V T E L Q T H P E L D T D 243  
*S. pombe* A V L P L D F Q D L R V A L L S L V D E R N - - - - - E M Q E R L D I L T N L L D E L T L L Y E T D K F D E T - - - - - 249  
*L. mexicana* - E Q E A Q W A E L E M K Q N E L E T G H Y - - - - - E S E F S D D A T S C I R W R Q T G G C I A T G P R - - - - - 252  
*S. cerevisiae* S R V S K G Y Q D I F K I L S D L S E A Y T P S L N D K V V N D N I K K F R K V R R A E K A K I N A D S K I D D E Q A D N L Y L Y F T E E V P Q I F L K R E S E N T L R 340

*H. sapiens* G D G A L S E A E A Q A L L S G D T Q T D A T S F Y D R V W A A I R D K Y R S - - E A L P T D L P A P S A P D L T E P K E E Q P P V P S S P T E E E E E E E E E E E E A 326  
*S. pombe* - - - - - M K E A I L S F E D L K E - - Q E I R R K V S S D D V H N Y L E S C N N H L S M L T G P S E D I T F S S L I K D I K K 306  
*L. mexicana* - - - - - E S H M D K S C S - - N V I K R D S S G Y C E C K T N D E K D E R E E D E E G V E R E A E G E G M K M H R G T 305  
*S. cerevisiae* Y V I G K S N F V Q A L V E G K I N Y T N D I L E Y I R E F R L I M D D I S Q N Y N V N F Q D A G V K S A V D S Y K N Y L G E Y G E L A E L E P A H P S E S L L R S L S E 425

*H. sapiens* E E E E E E D S E E A P P L S P P Q P A S P A E E D K M P P Y D E Q T Q A F I D A A Q E A R N K F E E A E R S L K D M E E S I R N L E Q E I S - F D F G P N G E F A Y 410  
*S. pombe* I L N S L V W N I K L S L I N F G I L S P S A S S - - - - - T P L T D S E S Y R R F E A A Q R D L D A A E E N E K S L E K E H T K L M H E L E Y H H - - - - - G W D L Y R A 382  
*L. mexicana* V T Y R F S C G H P N F T C M Y V C D H S G E V G V G K E T P - - K L Q N F T I L D E V R A A R E S L E R K K N R L E E V K R A M E A V K K L L S S S T I T T E N L L R T 388  
*S. cerevisiae* V T S F V N E N A P K V L P P D A V E S E Q D T N S D H I G T S G D L R N K L K E I L S K L N I F S S R K D L V S L E K R F R S C E S Q V S L L E N E L K Q K M D Y K K L 510

*H. sapiens* L Y S Q C - - - - - Y E L T T N E Y V Y R L C P F K L V S Q K P K L G G S P - - - - - T S L G T W G S - - - - - 451  
*S. pombe* I K G M E - - - - - T K R E I G G Y T Y K V V F Y E N V F Q D - - - - - S - - - - - I L L G N F A S - - - - - 417  
*L. mexicana* L E E E E - - - - - F T L D F E E Y T Y A V I M F D K V Y Q R - D I G K T T G G - - - - - S L L G S W K S - - - - - 430  
*S. cerevisiae* L D E T E D E G T N S T A G N L T E L L E L M G S Q S Y C L D D I L D N Y V Y T I C F Q R P M T E G V I Y Q A E D K V D G K K V L I G R F K T S G F N V D L N M E K Y A E 595

*H. sapiens* - - - - - W I G - - - - - P D H D K F S A M K Y E Q G T G C W Q G P N R S T T V R L L C G K E T M V T S T T E P S R C E Y L M E 505  
*S. pombe* - - - - - Q E G - - - - - N V L K Y E N G Q S C W N G P H R S A I V T V E C G V E N E I V S V L E A Q K C E Y L I K 465  
*L. mexicana* - - - - - F A E N T Y S V W A K D A Y D L S Q M I Y D N G W R C W N G V V R N V E V H L V C G P E N K L I A V E E P S M C N Y R M V 491  
*S. cerevisiae* H L K A T Y D E K S D L I S N L A A I Q D D D G N M Q H Y V F G N L N E L N N G L V L E Y E N G D Q C W N G P R R S A T V F V R C S D K F K I R S V H E A T K C N Y I F D 680

*H. sapiens* L M T P A A C P E P P P E A P T E D D H D E L - - - - - 528  
*S. pombe* M K S P A A C S P D Q L K Q S L L N T Q N S A N E N A V N G M E D K E S S V D E L 506  
*L. mexicana* F E T P A M C D D - - - - - 500  
*S. cerevisiae* V V G P L G C N K T F E Y E P P K F N L S E - - - - - 702

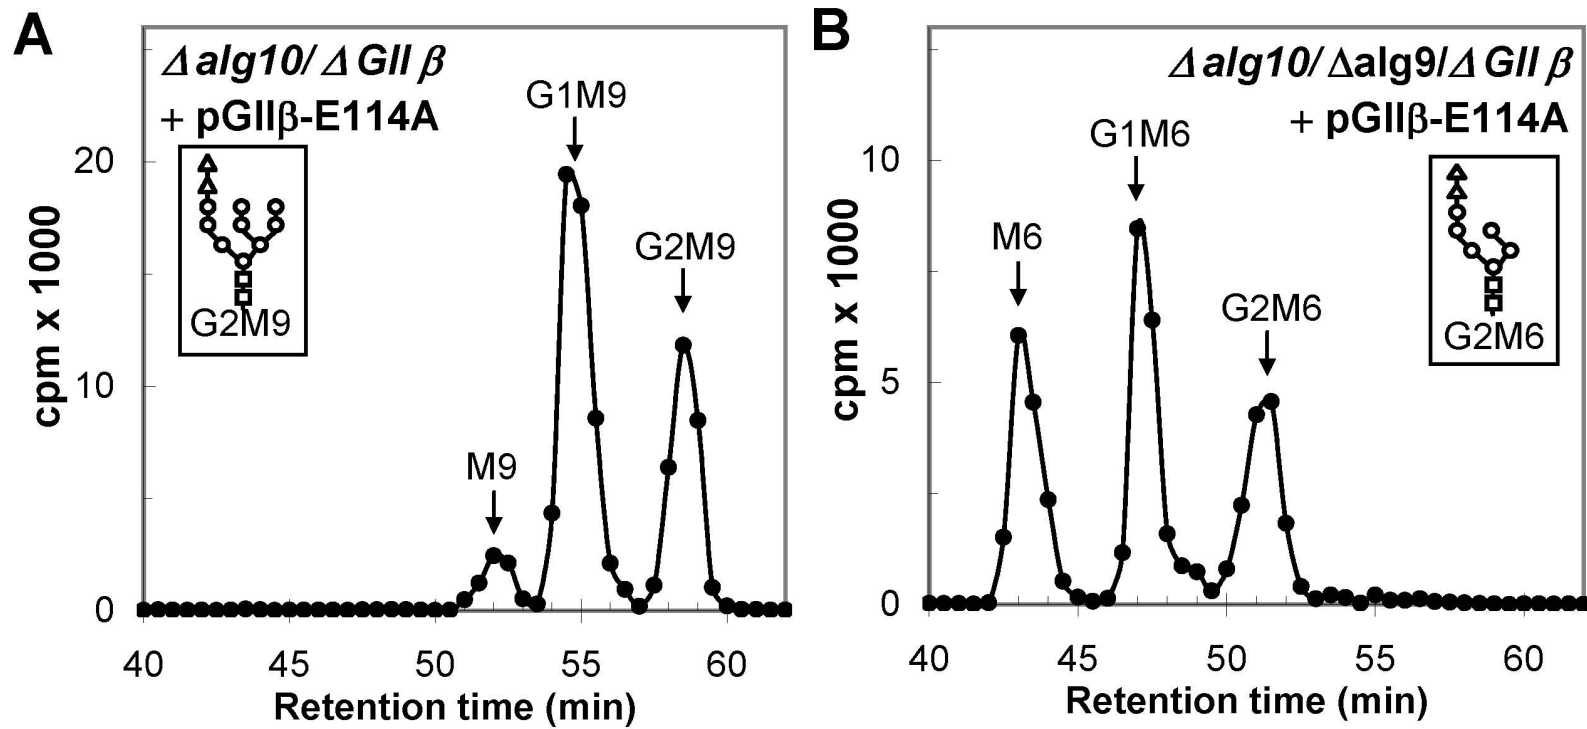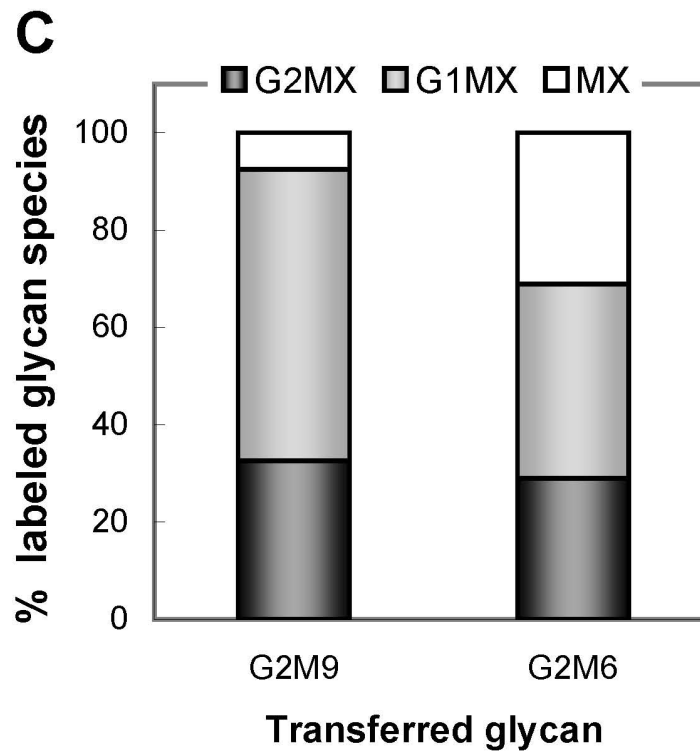

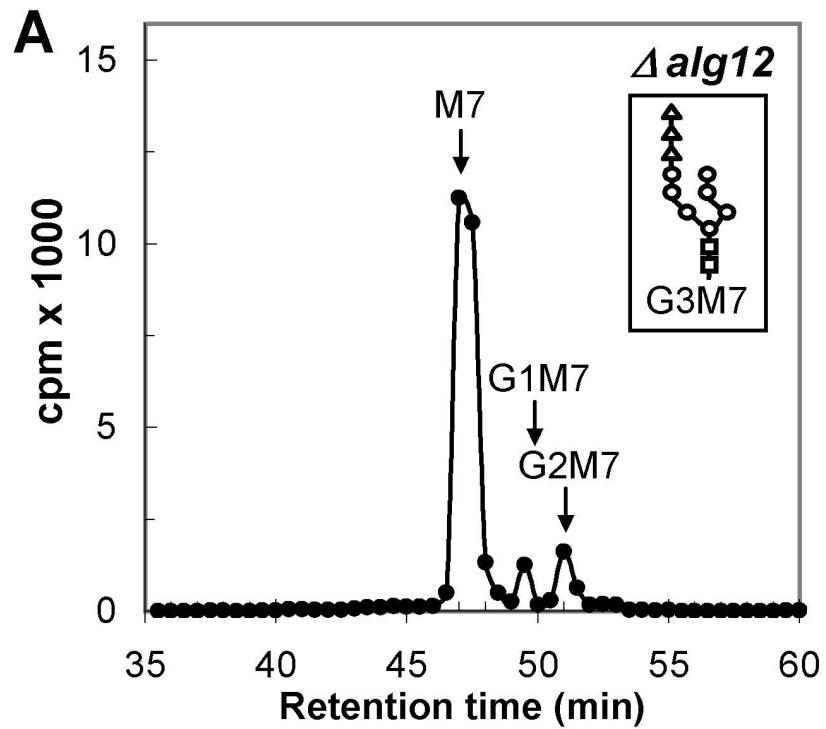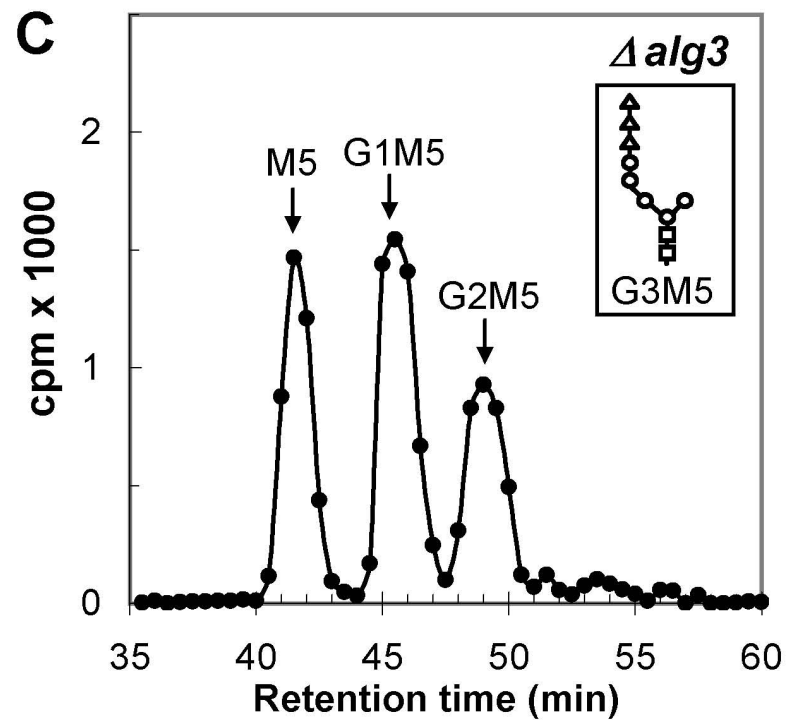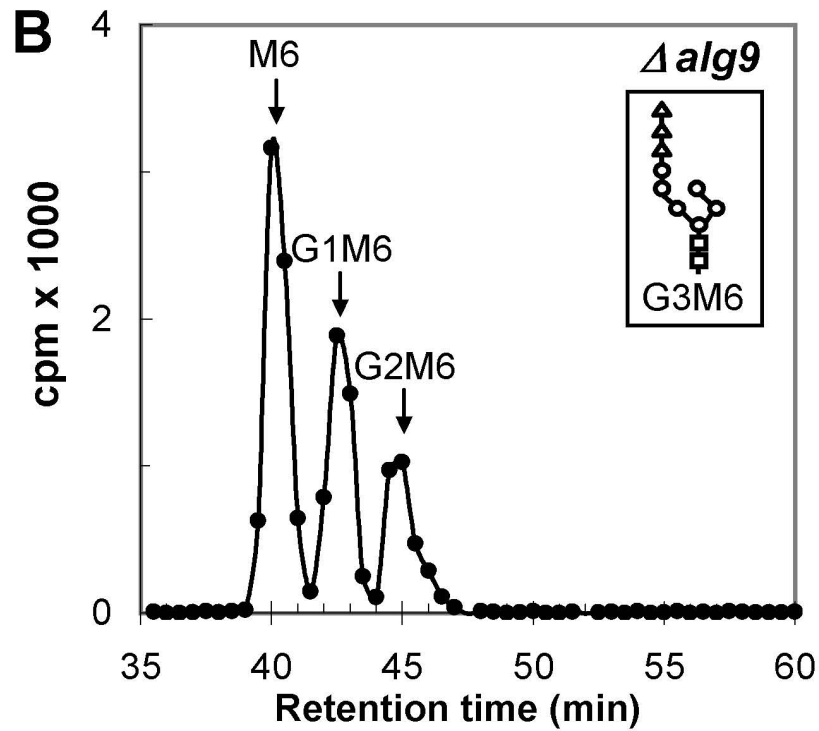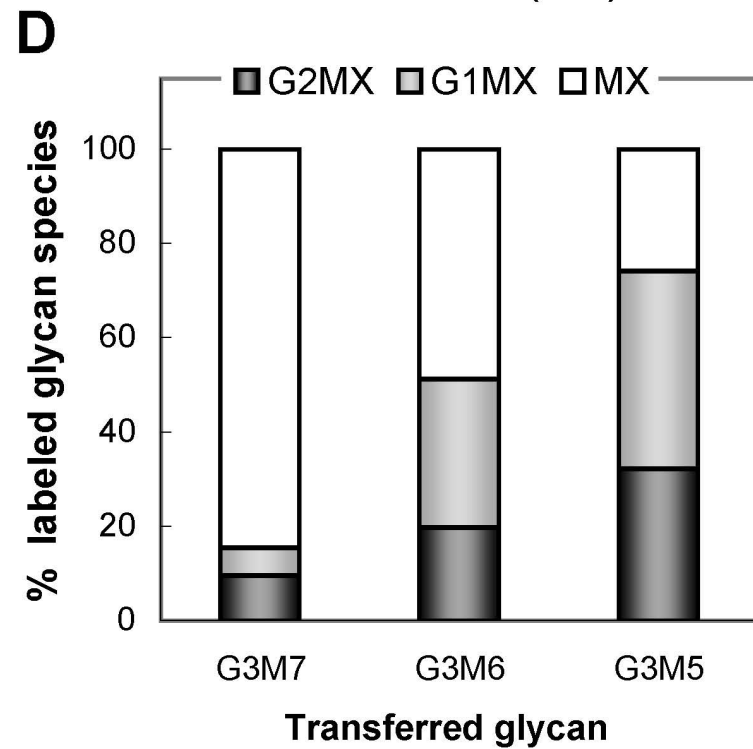

Supplement: E11-01-0019_1.pdf [file E11-01-0019_1.pdf]
